# Supplementary material for: Rapid Quantification of Major Volatile Metabolites in Fermented Food and Beverages Using Gas Chromatography-Mass Spectrometry
Source: Metabolites. 2017 Jul 27;7(3):37. doi: 10.3390/metabo7030037 (PMC5618322; doi:10.3390/metabo7030037)
Supplement: Supplementary file 1 [file metabolites-07-00037-s001.pdf]

# SupplementaryMaterials: Rapid Quantification of Major Volatile Metabolites in Fermented Food and Beverages Using Gas Chromatography-Mass Spectrometry

Farhana R. Pinu and Silas G. Villas-Boas

**Supplementary Table 1:** The origin of samples used in this study

| Sample                   | Type/variety         | Producer/Importer          | City         | Country     |
|--------------------------|----------------------|----------------------------|--------------|-------------|
| <b>Beers</b>             |                      |                            |              |             |
| Beer 1                   | Lager                | Lion Breweries             | Dunedin      | New Zealand |
| Beer 2                   | Pale lager           | DB Breweries               | Timaru       | New Zealand |
| Beer3                    | Indian pale ale      | Epic Brewing Company       | Auckland     | New Zealand |
| <b>White wines</b>       |                      |                            |              |             |
| White wine 1             | 2013 Sauvignon blanc | Brancott Estate            | Blenheim     | New Zealand |
| White wine 2             | 2012 Chardonnay      | Villa Maria Estate         | Auckland     | New Zealand |
| White wine 3             | 2012 Pinot Gris      | Huntaway Reserve           | Gisborne     | New Zealand |
| <b>Red wines</b>         |                      |                            |              |             |
| Red wine 1               | 2012 Merlot          | Sileni Estate Winery       | Hastings     | New Zealand |
| Red wine 2               | 2013 Pinot Noir      | Rippon Vineyard and Winery | Wanaka       | New Zealand |
| Red wine 3               | 2012 Syrah           | Misson Estate Winery       | Napier       | New Zealand |
| <b>Whiskies</b>          |                      |                            |              |             |
| Whisky 1                 | Single malt          | Glenkinchie Distilleries   | East Lothian | Scotland    |
| Whisky 2                 | Blended malt         | Diageo                     | Kilmarnock   | Scotland    |
| Whisky 3                 | Blended malt         | Blair Athol Distillery     | Pitlochry    | Scotland    |
| <b>Balsamic vinegars</b> |                      |                            |              |             |
| Vinegar 1                | –                    | MazzettiL'originale        | Modena       | Italy       |
| Vinegar 2                | –                    | MazzettiL'originale        | Modena       | Italy       |
| Vinegar 3                | –                    | William Aitken & Co.       | Modena       | Italy       |
| Vinegar 4                | –                    | Pams                       | Modena       | Italy       |
| Vinegar 5                | –                    | Delamaine Fine Foods       | Modena       | Italy       |
| Vinegar 6                | –                    | Tastemaker Limited         | Modena       | Italy       |
| <b>Sourdough samples</b> |                      |                            |              |             |
| Sourdough 1              | –                    | Waikato University         | Auckland     | New Zealand |
| Sourdough 2              | –                    | Waikato University         | Auckland     | New Zealand |
| Sourdough 3              | –                    | Farro Fresh                | Auckland     | New Zealand |
